# Supplementary material
Source: Springer Nature journal article supplement (https://www.springermedizin.de/resource/supplementary/12878_2012_59_MOESM1_ESM.pdf/9441638)

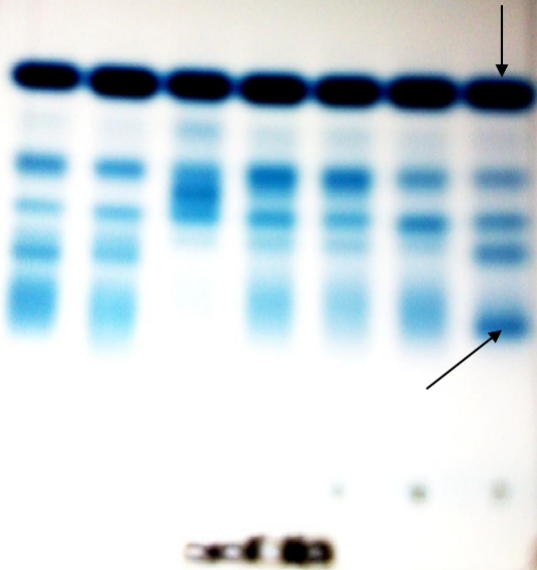

Supplement: MOESM1 [file 9441638]
